# Supplementary material for: The Auxiliary Role of the Amidase Domain in Cell Wall Binding and Exolytic Activity of Staphylococcal Phage Endolysins
Source: PubMed Central journal article supplement (PMC6024855; doi:10.3390/v10060284), 2018-05-25
Supplement: viruses-10-00284-s001.pdf [file viruses-10-00284-s001.pdf]

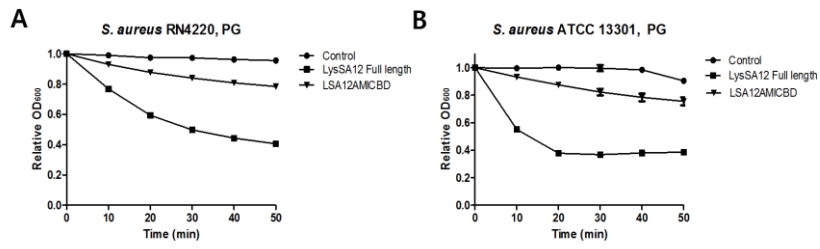

**Figure S1. Activity of the LysSA12 and LSA12AMICBD against purified peptidoglycan of *S. aureus* RN4220 and *S. aureus* ATCC 13301.** Equimolar concentrations (0.3  $\mu$ M) of the purified enzymes were added to a 1 ml purified peptidoglycan of (A) *S. aureus* RN4220 and (B) *S. aureus* ATCC 13301.
